# PNAS

[www.pnas.org](http://www.pnas.org)

## Main Manuscript for

### Mapping of genotype-by-environment interactions in phenology identifies two cues for flowering in switchgrass (*Panicum virgatum*)

Alice H. MacQueen<sup>\*^1</sup>, Li Zhang<sup>\*1</sup>, Jason Bonnette<sup>1</sup>, Arvid R. Boe<sup>2</sup>, Philip A. Fay<sup>3</sup>, Felix B. Fritsch<sup>4</sup>, David B. Lowry<sup>5</sup>, Robert B. Mitchell<sup>6</sup>, Francis M. Rouquette Jr<sup>7</sup>, Yanqi Wu<sup>8</sup>, Thomas E. Juenger<sup>^1</sup>

<sup>1</sup> Department of Integrative Biology, University of Texas at Austin, Austin, TX, USA

<sup>2</sup> Department of Agronomy, Horticulture and Plant Science, South Dakota State University, Brookings, SD, USA

<sup>3</sup> Grassland, Soil and Water Research Laboratory, USDA-ARS, Temple, TX, USA

<sup>4</sup> Division of Plant Sciences, University of Missouri, Columbia, MO, USA

<sup>5</sup> Department of Plant Biology, Michigan State University, East Lansing, MI, USA

<sup>5</sup> DOE Great Lakes Bioenergy Research Center, Michigan State University, East Lansing, MI, USA

<sup>6</sup> Wheat, Sorghum, and Forage Research Unit, USDA-ARS, Lincoln, NE, USA

<sup>7</sup> Texas A&M AgriLife Research and Extension Center, Texas A&M University, Overton, TX, USA

<sup>8</sup> Department of Plant and Soil Sciences, Oklahoma State University, Stillwater, OK, USA

\*These authors contributed equally.

**Corresponding authors:** ^Alice MacQueen, Thomas E. Juenger

**Email:** [alice.macqueen@utexas.edu](mailto:alice.macqueen@utexas.edu); [tjuenger@utexas.edu](mailto:tjuenger@utexas.edu)

PNAS strongly encourages authors to supply an [ORCID identifier](#) for each author. Do not include ORCIDs in the manuscript file; individual authors must link their ORCID account to their PNAS account at [www.pnascentral.org](http://www.pnascentral.org). For proper authentication, authors must provide their ORCID at submission and are not permitted to add ORCIDs on proofs.

**Author Contributions:** T.E.J. designed research. D.B.L. contributed plant material and resources. J.B., D.B.L., and T.E.J. designed and executed field experiments. A.R.B., P.A.F., F.B.F., D.B.L., R.B.M., F.M.R., Y.W., and T.E.J. hosted field experiments. A.H.M. and L.Z.

conducted statistical and computational analyses. The manuscript was written by A.H.M., L.Z., and T.E.J. with contributions from all authors.

**Competing Interest Statement:** The authors declare no conflict of interest.

**Classification:** Biological Sciences; Population Biology.

**Keywords:** allele-by-environment effect variation, antagonistic pleiotropy, photoperiod, cumulative growing degree days, genetic variation

### This PDF file includes:

Main Text  
Figures 1 to 4  
Table 1

### Abstract

Plant phenological timings are major fitness components affected by multiple environmental cues; thus, phenological traits can have important genotype-by-environment interactions (GxE). We use a flexible, data-driven method to characterize GxE in the timing of vegetative growth ('green-up') and flowering across eight environments and in two highly divergent switchgrass (*Panicum virgatum*) populations. We classified polygenic GxE patterns as suggestive of modulation of genetic effects via weather-based cues—or other, unknown modulators. >26% of Gulf population SNPs affecting flowering had effects that covaried with photoperiodicity and >34% of Midwest upland population SNPs affecting flowering had effects that covaried with cumulative growing degree days. 76% of SNP effects on green-up showed antagonistic pleiotropy, a change in effect sign, between environments native to Gulf plants (Texas) and environments native to Midwest plants (North). In contrast, <2% of flowering effects showed antagonistic pleiotropy; the majority (>64%) showed no GxE. Top GxE-associated SNPs were highly enriched in the top associations from an independent pseudo-F2 cross of individuals from the same two populations. Breeding for particular alleles at GxE-associated loci could change flowering responsiveness to photoperiod cues in switchgrass. More broadly, this approach could be used to flexibly characterize patterns of GxE across species, populations and environments.

### Significance Statement

The timing of plant seasonal development (phenology) has major impacts on fitness because of the negative consequences of plant-environment mismatches. Here we map the genetic basis of two phenological events, the start of above-ground growth and flowering, in two genetically and phenologically distinct populations of switchgrass. We do this at eight field locations spanning the latitudinal range of both populations. Our approach allows us to identify regions of the genome with effects that covary with weather-related environmental features at every location. For flowering, these features differed by population: the Midwest population had genetic effects that primarily covaried with cumulative growing degree days, a temperature-related measure, while the Gulf population had genetic effects that primarily covaried with photoperiod, a day-length-related measure.

## Main Text

### Introduction

The timing of plant vegetative and reproductive development are major components of plant fitness affected by multiple external environmental cues (e.g. degree of winter chilling, day length, temperature, and water availability) that signal existing or upcoming growing conditions (1–3). Genetic responses to environmental cues determine the speed, timing, and energy apportioned to vegetative and reproductive growth and shape both the individual's lifespan and its lifetime production of viable seed. Day length (or photoperiod) is one of the most predictable environmental cues, and genetic sensitivity to photoperiod protects plants from potentially fatal consequences of phenological responses to temperature cues at the “wrong” time of year. However, the usefulness of specific environmental cues depends on both features of the environment and the species' adaptive strategies (4). Species with wide natural distributions can have multiple distinct environmentally-cued phenological responses: for example, populations of sunflower (*Helianthus annuus*) exhibit day-neutral, facultative short day, and facultative long-day flowering responses, which vary with their environments (5, 6). Distinct genetic responses in different environments are known as genotype by environment interactions, or GxE.

Flowering time, in particular, is a common subject of GxE research (5–11), a key output of selection driving adaptation to local environments (3, 12, 13), and a major target for crop improvement to adapt crops to local or future environments (14). Changing flowering responsiveness to photoperiod cues has allowed geographic range expansion and increased yields in a number of cereal species (15–19) and other crops (20, 21). Recent statistical advances in studying phenological GxE have involved determining critical environmental indices before the phenological event occurs, such as photothermal time within a critical growth window (10). However, most studies of flowering GxE focus on finding a single, best fitting form of genotype-environment covariance, despite the key expectation that different genetic subpopulations, and even different genomic regions, have likely evolved distinct patterns of GxE. Additionally, despite theoretical predictions that local adaptation should involve antagonistic pleiotropy, or sign-changing GxE, at the level of individual loci (22–25), previous work has found limited evidence of antagonistic pleiotropy (12, 26), but has been limited by a known statistical bias that reduced detection of antagonistic pleiotropy (26–28). Thus, despite substantial interest in the frequencies of various forms of GxE, the prevalence of antagonistic pleiotropy relative to other forms of GxE remains unknown.

Switchgrass (*Panicum virgatum*) is considered a short-day plant with reproductive development strongly linked to day of the year (29). However, as part of its wide environmental adaptation across the eastern half of North America, its photoperiodicity has been predicted to differ by plant latitude of origin (30, 31). We previously found divergent Midwest and Gulf genetic subpopulations of switchgrass which segregate for distinct sets of climate adaptations (32). The Midwest genetic subpopulation is primarily composed of individuals from the well-studied upland switchgrass ecotype (33, 34), while the Gulf subpopulation has individuals from the lowland ecotype and the phenotypically intermediate coastal ecotype (32). Here, we test if these populations differ in their phenological adaptations and hence their phenological GxE. We phenotype a diversity panel of hundreds of switchgrass genotypes from the Midwest and Gulf subpopulations for the start of vegetative development (“green-up”) and reproductive development (flowering) at eight common garden locations spanning 17 degrees of latitude. These gardens cover the majority of the latitudinal and climatic range of switchgrass and capture the most comprehensive picture to date of the environmental variation this species encounters. We determine the genetic component of variation in green-up and flowering dates, then genetically map these traits using multivariate adaptive shrinkage (mash) (35), which allows us to specify multiple ways genetic marker effects may covary with the environment, and does not have a statistical bias in detecting frequencies of sign-changing versus magnitude changing GxE. To

confirm our genetic mapping of GxE, we compare to mapping results from an outbred pseudo-F<sub>2</sub> cross grown at the same sites. Taken together, our results allow us to describe the environmental cues and genetic variation affecting phenology in two divergent natural populations of switchgrass.

## Results

In our diversity panel of tetraploid switchgrass (32), genotypes from the Gulf and Midwest genetic subpopulations had distinct phenological timings and distinct patterns of phenological correlations across our eight common garden sites (Fig. 1A,B). At the three Texas common gardens (hereafter 'Texas' gardens), located within the natural range of the Gulf subpopulation, Gulf green-up occurred before Midwestern green-up, and Gulf flowering occurred after Midwestern flowering (Fig. 1A). At the four northernmost common gardens (hereafter 'North' gardens), located within the natural range of the Midwest subpopulation, both Gulf green-up and flowering occurred after Midwest green-up and flowering. At the Oklahoma common garden, located near the natural range limits of both the Gulf and the Midwest subpopulations, Gulf and Midwest green-up occurred over the same time period. These patterns led to strong negative phenotypic correlations for green-up between the North and Texas gardens and contributed to positive phenotypic correlations for flowering time of larger magnitude at more northern gardens (Fig. 1B).

Narrow-sense heritabilities ( $h^2$ ) indicated that rank-changing GxE for these phenotypes was present across the common gardens (Fig 1C).  $h^2$  were typically high at individual gardens: 59% on average for green-up date, and 87% for flowering date. However,  $h^2$  were variable across gardens, and green-up dates were uncorrelated ( $r^2 < 0.2$ ) or negatively correlated between pairs of gardens (Fig. 1B). These negative and small correlations undoubtedly contributed to the low  $h^2$  values for green-up and flowering date when estimated jointly at all eight gardens:  $h^2$  was 0.8% for green-up and 23.2% for flowering date.

Genetic (G) and GxE effects explained little variation in green-up date across all gardens (<10%), but did explain substantially more variation when green-up was defined as a function of a weather-based cue (SI Appendix, Section S1, Table S1, Fig. S1). G and GxE explained more variation in green-up date (up to 60%) when the sites were restricted to either the Texas or North gardens, but in this case, defining green-up as functions of weather-based cues did not explain additional variation in green-up date (SI Appendix, Fig. S1). Interestingly, green-up G and GxE effects were larger for populations grown at gardens outside of that population's native range.

In contrast to green-up date, G and GxE effects explained moderate variation in flowering date, and explained significantly more variation when flowering was defined as a function of a weather-based cue (Fig. 1D, SI Appendix, Section S1, Table S1). In the Gulf subpopulation, defining flowering as a function of day length explained more variation as G and GxE than when flowering was a function of day of the year (Fig. 1D). In the Midwest subpopulation, a cumulative growing degree day (GDD) cue explained more variation as G than flowering date, while three additional cues (day length, rainfall between green-up and flowering, and rainfall in the five days before flowering) explained more variation as G and GxE than flowering date (Fig. 1D). The variation explained by G and GxE was higher when the common gardens were restricted to either the Texas or North gardens. For subpopulations growing at gardens outside their native ranges, G and GxE explained a substantial amount of variation in flowering as a function of rainfall cues, particularly for rainfall on the day of flowering (Fig. 1D). Taken together, these data indicate that the Midwest subpopulation has moderate additive genetic variation for a cumulative GDD-based flowering cue, while the Gulf subpopulation has a similar amount of genetic variation for a day-length-based flowering cue. They indicate that GxE is present for rainfall, cumulative GDD, and photoperiod cues for flowering.

### *Mapping major patterns of genotype-by-environment effects on green-up and flowering*

We explored how genetic variation in phenology covaried with environmental cues by using mash to jointly estimate SNP-associated trait effects across all common gardens for the Midwest, Gulf, and 'Both' subpopulations (SI Appendix, Datasets 1-6). We included "hypothesis-based" covariance matrices in each mash model by mapping weather-based variables onto phenological dates for all individuals in a population, then finding correlations in these variables across common gardens (Figure 2A; SI Appendix, Section S2). These matrices differed substantially by weather-based cue and by population of origin of the genotypes included (Fig 2A,D). For mash models estimating SNP effects for Both subpopulations, the hypothesis-based covariance matrices significantly improved the model fit (green-up likelihood ratio (LR) = 774; flowering LR = 2942). For single subpopulation mash models, the hypothesis-based covariance matrices improved model fits for Midwest green-up and for Gulf flowering, but did not improve it for the other phenotype (Midwest green-up LR = 866; flowering LR = -3063; Gulf green-up LR = -318; flowering LR = 1279).

For green-up date, SNP-associated phenotypic effects covaried with different weather-based cues in different subpopulations (Fig 2B), suggesting that these genetic effects were modulated by these weather-based cues. In total, 28.6% of the posterior weight of SNP effects in the mash model of Midwest green-up fell on a covariance matrix of average temperature in the 10 days prior to Midwest green-up. Mash models of Gulf and Both subpopulation green-up did not have high weights on this matrix; instead, they had small but non-zero weights on two other hypothesis-based matrices, average temperature and cumulative GDD in the 18 days prior to green-up.

For flowering date, we also observed that distinct weather-based cues captured SNP-associated effect patterns in the Gulf and Midwest subpopulations. 12.1% of SNP effects on flowering in the Gulf subpopulation covaried with day length in the time period when Gulf and Midwest genotypes were flowering, while 14% of SNP effects covaried with day length change shortly before Gulf genotypes were flowering (when Midwest genotypes were flowering, Fig. 2E). In contrast, many SNP effects on flowering in the Midwest subpopulation covaried with cumulative GDD from green-up to the time period during (14.6%) and after (14.0%) when Midwest genotypes were flowering (Fig. 2E). SNP effects in the Midwest subpopulation did not covary with patterns of day length or day length change at flowering. Few (2.3%) SNP effects in the Gulf subpopulation covaried with flowering cumulative GDD. Mash detected covariance with both sets of environmental cues in effects estimated using the combined population, in that all three matrices had large posterior weights in the Both subpopulation mash model. Overall, flowering posterior weights on hypothesis-based matrices were higher than green-up weights (Fig 2C,F). This indicated that our hypothesized weather-based cues for phenology captured more variation in SNP effects for flowering than for green-up.

In all six mash models, the hypothesis-based covariance matrices captured a minority of the significant SNP effects present in the data (Figure 2C,F). Most SNPs had high posterior weights on the data-driven (DD) covariance matrices specific to each mash model; we thus explored patterns of SNP effects described by these matrices. We also characterized the overall patterns of differential sensitivity and antagonistic pleiotropy for SNP effects at all pairs of gardens.

For green-up mash models, one of the two major data-driven effect patterns was a pattern of antagonistic pleiotropy between pairs of Texas and North gardens. The largest fraction of SNP effects had high posterior weights on the DD\_tPCA matrices, which were overall matrices describing all data-driven effects; 61-91% of the variation in the DD\_tPCA matrices was explained by two garden-based patterns of effects (Fig. 3A, SI Appendix, Fig. S2A-C), corresponding to the patterns of the first eigenvectors of DD\_PCA\_1 and DD\_PCA\_2, two additional data-driven matrices which also had non-zero mash posterior weights (Fig. 2B). For all three subgroups, one

of these two effect patterns was characterized by large magnitude ( $>|0.5|$ ) effects delaying green-up in the Texas gardens and in Oklahoma, with small ( $<|0.2|$ ) to moderate ( $|0.2|$  to  $|0.5|$ ) magnitude effects advancing green-up in MO and MI. 76% of SNP effects on green-up exhibited antagonistic pleiotropy in Both subpopulations between pairs of Texas and North gardens (Table 1, Fig. 3B); only 20% of SNP effects showed differential sensitivity (Fig. 3C). Fewer SNPs (12%) exhibited antagonistic pleiotropy and more exhibited differential sensitivity (52%) for green-up effects in the Midwest subpopulation than in the Gulf and Both subpopulations (SI Appendix, Fig. S2D-I, Table S2).

For flowering mash models, similar fractions of SNP effects had high posterior weights on the DD\_tPCA and DD\_PCA\_1 data-driven matrices, which captured fairly consistent patterns across subpopulations (Fig. 3D, SI Appendix Fig 2J-L). This pattern was characterized by large magnitude effects of consistent sign that differed in their magnitude by garden (Fig. 3D). No more than 2% of SNP effects on flowering exhibited antagonistic pleiotropy between pairs of gardens (Fig. 3E, SI Appendix Fig. 2M-R); instead, 34% of SNP effects showed differential sensitivity between Texas and North pairs of gardens (Table 1, Fig. 3F), and the majority of significant effects ( $>64\%$ ) showed no detectable GxE, or effects of consistent magnitude and sign.

#### *Confirmation of genotype-by-environment effects using an independent mapping population*

We sought additional experimental support for significant SNPs from mash using an independent pseudo-F2 mapping population created from Gulf & Midwest individuals and grown at the same sites (Fig. 4A,B). We conducted quantitative trait loci (QTL) mapping of flowering as functions of four environmental cues with high posterior weights in mash, and identified eight QTL for flowering date, six QTL for flowering GDD, ten QTL for flowering day length, and eight QTL for flowering day length change, all of which showed QTL by environment interactions (SI Appendix, Fig. S3). All QTL for flowering overlapped one or more homologs from rice or *A. thaliana* with functionally validated roles in flowering (SI Appendix, Dataset 7). All flowering QTL intervals contained at least one SNP significant in at least one mash run at a  $\log_{10}$ -transformed Bayes Factor  $> 2$ , or in the 1% tail of significance, whichever was stricter (SI Appendix, Dataset 8). We also looked for enrichments of mash SNPs in the 1% tail of significance (the 'mash 1% tail') within each QTL interval. At the 5% level, ten QTL had enrichments of SNPs in the mash 1% tail. Overall, there were 16 significant enrichments ( $p < 0.05$ , hypergeometric test) of SNPs in the mash 1% tail in the QTL intervals. Our QTL intervals had more enrichments of SNPs in the mash 1% tail than were found for all but three of these sets of random genomic intervals (Fig. 4C,  $p = 0.003$ ). Thus, we were able to experimentally support our mash intervals with a QTL mapping experiment using a separate mapping population.

#### **Discussion**

As the climate and the natural environment change, it is increasingly critical to understand how patterns of gene-environment and plant-environment interactions will change in response. To do this, we must understand the current patterns of trait covariation across environments, the genetic underpinnings of these patterns, and the cases where this covariation can be altered. Here, we demonstrate that we can associate multiple patterns of GxE with specific genomic regions using a switchgrass diversity panel grown at eight common gardens, and also that we can assign specific SNP-associated patterns of GxE to both weather-based cues and to other, data-driven patterns. We use this approach to study GxE in both green-up and flowering phenological data in the deeply genetically diverged Gulf and Midwest populations of switchgrass.

Our analysis of green-up in the Gulf and in Both subpopulations revealed substantial antagonistic pleiotropy in effects between the Texas and North gardens (Figure 3A). This result supports theoretical models that local adaptation should involve antagonistic pleiotropy at the level of individual loci (22–25), and is the first experimental work using QTL mapping and GWAS across common gardens to find antagonistic pleiotropy to be common in small genomic regions (12, 36, 37).

Our analysis of flowering showed that the Gulf and Midwest subpopulations have two distinct photoperiod-related flowering responses: the Midwest subpopulation is day neutral, and flowering is cued primarily by a cumulative GDD threshold; in contrast, the Gulf subpopulation is photoperiod sensitive, and flowering is cued by the transition to shortening days. This result was supported by observations that expressing flowering date as a function of the day length at flowering increased its heritability in the Gulf subpopulation, while expressing flowering date as a function of cumulative GDD between green-up and flowering increased the heritability of flowering in the Midwest subpopulation (Fig. 1D). The genomic regions affecting flowering found in mash were also supported by QTL from an independent mapping population (Fig. 4C).

Identifying the environmental cues that are predictive of, or even correlated with, plant phenotypic responses remains a major challenge to studies interrogating gene action across many natural environments. Clearly, the photoperiod and cumulative GDD cues we identify here are functions of the genotypes measured, are not predictive, and capture only a minority of SNP effects on flowering. We know still less about the overwintering parameters that affect green-up, which is reflected in our lower ability to assign SNP effects on green-up to weather-based cues. More generally, it is difficult to predict the time scales over which individuals may integrate environmental cues, particularly in perennial species which may integrate these cues over longer time scales. Mash offers an opportunity to specify multiple environmental cues and compete them to explain patterns of SNP effects, allowing us to detect how important these cues are genome-wide, and how strongly each cue influences each SNP. This is a key development to further improve our understanding of genetic variation in GxE.

## Materials and Methods

Whenever possible, plant material will be shared upon request. Source data and code to replicate these analyses are available at: <https://github.com/Alice-MacQueen/pvdiv-phenology-gxe.git>. SNP data to replicate these analyses are available from the UT dataverse at: <https://doi.org/10.18738/T8/A604BU>.

### *Genotype-by-environment effects on green-up and flowering as functions of weather-based cues*

In 2019, we scored two phenological events every two days in two mapping populations of switchgrass, a diversity panel and a pseudo-F2 cross, planted at eight common garden locations (32, 34, 37). We scored green-up date as the day of the year when 50% of the tiller area of the crown of the plant cut the previous year had green growth. Flowering date was the day of the year when 50% of the plant tillers had panicles undergoing anthesis. We scored green-up and flowering as day of the year, then linked these dates to multiple weather-based environmental factors measured daily at each common garden (SI Appendix, Section S1, Table S1).

The formation and resequencing of the diversity panel has been described previously (32). The diversity panel contained 134 sequenced, clonally propagated individuals from the Midwest genetic subpopulation, and 229 from the Gulf genetic subpopulation. To allow for the possibility that different subpopulations had different strengths of connection between our phenotypes and genotypes (38), we conducted three sets of genetic analyses: on Gulf and Midwest genotypes separately, and on both subpopulations together ('Both'). Analyses to determine narrow-sense heritability ( $h^2$ ) for green-up and flowering, and variance components analyses to partition variance attributed to genetic effects (G), genotype by environment interactions (GxE), environmental effects (E), and error for these phenology-related traits were done using linear mixed models and followed (32). Details on these models can be found in (SI Appendix, Section S3,S4).

### *Mapping major patterns of genotype-by-environment effects on green-up and flowering*

To evaluate the prevalence and kinds of covariance patterns of SNP effects across our common gardens, we used multivariate adaptive shrinkage (mash) on SNP effect estimates from the diversity panel (35). Mash is a statistical method that allows estimation and comparison of many effects jointly across many different conditions; it improves on previous methods by allowing multiple, arbitrary correlations in effect sizes among conditions (SI Appendix, Section S5). To obtain SNP effect estimates, we first conducted univariate genome-wide association at each common garden for green-up and flowering date. We then analyzed SNP effects for the top 19K relatively unlinked ( $r^2 < 0.2$ ) SNPs per condition using mash, as in (32). Details on these models can be found in (SI Appendix, Section S6).

We generated hypothesis-based covariance matrices derived from correlations in environmental cues in the green-up or flowering date windows for the three subpopulations (SI Appendix, Table S1, Section S1). These covariance matrices represent correlations between identical genotypes drawn from a specific population at pairs of common gardens; covariances near one mean that the population has a strong, positive linear relationship in individual responses at that pair of gardens, while covariances near zero mean that there is no relationship within the population for individual responses at that pair of gardens. Mash SNP effects will undergo strong shrinkage towards one another in the first case, and little shrinkage in the second case. Mash also generates data-driven covariance matrices corresponding to major patterns of effect correlations present in the data. We generated six data-driven matrices per mash run, five (denoted DD\_PCA\_1 through DD\_PCA\_5) produced by singular value decomposition (SVD) of a sixth, overall matrix, denoted 'DD\_tPCA'. We used SVD to present vectors of garden-specific effects for each numbered DD\_PCA matrix, because the first eigenvector of a SVD explains 100% of the variation in these matrices, and in our models, each value in this eigenvector has a straightforward interpretation, representing the effect magnitude and sign at one common garden.

Last, we characterized the overall patterns of differential sensitivity and antagonistic pleiotropy between SNPs with significant effects at all pairs of gardens. To do this, we used the 'get\_GxE' function of the switchgrassGWAS R package. This function first determines the set of SNPs with evidence of significant effects in both conditions for all pairs of conditions using local false sign rates (lfsr) as the significance criteria. lfsr are analogous to false discovery rates but more conservative, in that they also reflect the uncertainty in the estimation of the sign of the effect (39). For antagonistic pleiotropy, this function determines if effects significant in both conditions are of opposite sign. For differential sensitivity, this function determines if effects significant in both conditions are of the same sign and of a magnitude (not tested for significance) that differs by a factor of 0.4 or more. Our use of the lfsr to determine significance and our specification that SNP effects must be significant in both conditions to be included means that our tests for differential sensitivity and antagonistic pleiotropy carry an equal statistical burden. This is an important advance on previous studies of antagonistic pleiotropy (e.g. (37)), where statistical tests for antagonistic pleiotropy were conservative, in that they required two non-zero effects of different signs, while tests for differential sensitivity required only one non-zero effect. Previous work recognized that this testing bias could lead to undercounting occurrences of antagonistic pleiotropy (26, 27), and sought to reduce it by permutation (28); this work does not have the same limitation.

#### *Confirmation of genotype-by-environment effects using an independent mapping population*

To confirm candidate genomic regions and patterns of allelic effects found in the diversity panel, we analyzed flowering in an outbred pseudo-F2 cross between four individuals, two Midwest and two Gulf individuals. The formation of this mapping population has been described previously (34); additional details on QTL mapping can be found in SI Appendix, Section S6. To be directly comparable to the diversity panel data, only 2019 phenology data from the pseudo-F2 cross from the same eight common garden sites were used. To compare our QTL enrichments of significant mash associations to the null expectation, we used permutation to choose 1000 sets of



23 genomic regions of the same size randomly distributed throughout the genome, then calculated enrichments of the mash 1% tail in these random intervals.

## Acknowledgments

We thank the Brackenridge Field laboratory, the Ladybird Johnson Wildflower Center, and the Juenger laboratory for support with plant care and propagation, and Arbel Harpak for helpful manuscript comments. This material is based upon work supported in part by the Great Lakes Bioenergy Research Center, U.S. Department of Energy, Office of Science, Office of Biological and Environmental Research under Award Numbers DE-SC0018409 and DE-FC02-07ER64494, the US Department of Energy Awards DESC0014156 to T.E.J., DE-SC0017883 to D.B.L, National Science Foundation PGRP Awards IOS0922457 and IOS1444533 to T.E.J, and the Long-term Ecological Research Program (DEB 1832042) at the Kellogg Biological Station.

## References

1. W. L. Bauerle, *et al.*, Photoperiodic regulation of the seasonal pattern of photosynthetic capacity and the implications for carbon cycling. *Proc Natl Acad Sci USA* **109**, 8612 (2012).
2. C. Körner, D. Basler, Phenology Under Global Warming. *Science* **327**, 1461 (2010).
3. F. Andrés, G. Coupland, The genetic basis of flowering responses to seasonal cues. *Nature Reviews Genetics* **13**, 627–639 (2012).
4. C. A. Botero, F. J. Weissing, J. Wright, D. R. Rubenstein, Evolutionary tipping points in the capacity to adapt to environmental change. *Proc Natl Acad Sci USA* **112**, 184 (2015).
5. B. K. Blackman, Interacting duplications, fluctuating selection, and convergence: the complex dynamics of flowering time evolution during sunflower domestication. *Journal of Experimental Botany* **64**, 421–431 (2013).
6. L. P. Henry, R. H. B. Watson, B. K. Blackman, Transitions in photoperiodic flowering are common and involve few loci in wild sunflowers (*Helianthus*; Asteraceae). *American Journal of Botany* **101**, 1748–1758 (2014).
7. J. Ågren, C. G. Oakley, S. Lundemo, D. W. Schemske, Adaptive divergence in flowering time among natural populations of *Arabidopsis thaliana*: Estimates of selection and QTL mapping. *Evolution* **71**, 550–564 (2017).
8. B. Brachi, *et al.*, Linkage and Association Mapping of *Arabidopsis thaliana* Flowering Time in Nature. *PLoS Genet* **6**, e1000940 (2010).
9. E. L. Dittmar, C. G. Oakley, J. Ågren, D. W. Schemske, Flowering time QTL in natural populations of *Arabidopsis thaliana* and implications for their adaptive value. *Molecular Ecology* **23**, 4291–4303 (2014).

10. X. Li, T. Guo, Q. Mu, X. Li, J. Yu, Genomic and environmental determinants and their interplay underlying phenotypic plasticity. *Proc Natl Acad Sci USA* **115**, 6679–6684 (2018).
11. J. A. Romero Navarro, *et al.*, A study of allelic diversity underlying flowering-time adaptation in maize landraces. *Nature Genetics* **49**, 476–480 (2017).
12. S. M. Wadgyamar, *et al.*, Identifying targets and agents of selection: innovative methods to evaluate the processes that contribute to local adaptation. *Methods in Ecology and Evolution* **8**, 738–749 (2017).
13. M. Blümel, N. Dally, C. Jung, Flowering time regulation in crops—what did we learn from Arabidopsis? *Current Opinion in Biotechnology* **32**, 121–129 (2015).
14. C. Jung, A. E. Müller, Flowering time control and applications in plant breeding. *Trends in Plant Science* **14**, 563–573 (2009).
15. A. Turner, J. Beales, S. Faure, R. P. Dunford, D. A. Laurie, The Pseudo-Response Regulator Ppd-H1 Provides Adaptation to Photoperiod in Barley. *Science* **310**, 1031–1034 (2005).
16. S. Faure, *et al.*, Mutation at the circadian clock gene EARLY MATURITY 8 adapts domesticated barley (*Hordeum vulgare*) to short growing seasons. *PNAS* **109**, 8328–8333 (2012).
17. H.-Y. Hung, *et al.*, ZmCCT and the genetic basis of day-length adaptation underlying the postdomestication spread of maize. *PNAS* **109**, E1913–E1921 (2012).
18. S. Zakhrebekova, *et al.*, Induced mutations in circadian clock regulator Mat-a facilitated short-season adaptation and range extension in cultivated barley. *PNAS* **109**, 4326–4331 (2012).
19. Y. Yang, Q. Peng, G.-X. Chen, X.-H. Li, C.-Y. Wu, OsELF3 Is Involved in Circadian Clock Regulation for Promoting Flowering under Long-Day Conditions in Rice. *Molecular Plant* **6**, 202–215 (2013).
20. P. A. Pin, O. Nilsson, The multifaceted roles of FLOWERING LOCUS T in plant development. *Plant, Cell & Environment* **35**, 1742–1755 (2012).
21. J. L. Weller, *et al.*, Parallel origins of photoperiod adaptation following dual domestications of common bean. *Journal of Experimental Botany* **70**, 1209–1219 (2019).
22. H. Levene, Genetic Equilibrium When More Than One Ecological Niche is Available. *The American Naturalist* **87**, 331–333 (1953).
23. J. Felsenstein, The Theoretical Population Genetics of Variable Selection and Migration. *Annual Review of Genetics* **10**, 253–280 (1976).
24. T. J. Kawecki, D. Ebert, Conceptual issues in local adaptation. *Ecology Letters* **7**, 1225–1241 (2004).

25. P. W. Hedrick, Genetic Polymorphism in Heterogeneous Environments: A Decade Later. *Annual Review of Ecology and Systematics* **17**, 535–566 (1986).
26. D. L. Des Marais, K. M. Hernandez, T. E. Juenger, Genotype-by-Environment Interaction and Plasticity: Exploring Genomic Responses of Plants to the Abiotic Environment. *Annual Review of Ecology, Evolution, and Systematics* **44**, 5–29 (2013).
27. J. T. Anderson, J. H. Willis, T. Mitchell-Olds, Evolutionary genetics of plant adaptation. *Trends Genet* **27**, 258–266 (2011).
28. J. T. Anderson, C.-R. Lee, C. Rushworth, R. Colautti, T. Mitchell-Olds, Genetic tradeoffs and conditional neutrality contribute to local adaptation. *Mol Ecol* **22**, 699–708 (2013).
29. R. B. Mitchell, K. J. Moore, L. E. Moser, J. O. Fritz, D. D. Redfearn, Predicting Developmental Morphology in Switchgrass and Big Bluestem. *Agronomy Journal* **89**, 827–832 (1997).
30. D. J. Parrish, J. H. Fike, The Biology and Agronomy of Switchgrass for Biofuels. *Critical Reviews in Plant Sciences* **24**, 423–459 (2005).
31. M. D. Casler, K. P. Vogel, C. M. Taliaferro, R. L. Wynia, Latitudinal Adaptation of Switchgrass Populations. *Crop Science* **44**, 293–303 (2004).
32. J. T. Lovell, *et al.*, Genomic mechanisms of climate adaptation in polyploid bioenergy switchgrass. *Nature*, 1–7 (2021).
33. C. L. Porter, An Analysis of Variation Between Upland and Lowland Switchgrass, *Panicum Virgatum* L., in Central Oklahoma. *Ecology* **47**, 980–992 (1966).
34. E. R. Milano, D. B. Lowry, T. E. Juenger, The Genetic Basis of Upland/Lowland Ecotype Divergence in Switchgrass (*Panicum virgatum*). *G3 Genes|Genomes|Genetics* **6**, 3561–3570 (2016).
35. S. M. Urbut, G. Wang, P. Carbonetto, M. Stephens, Flexible statistical methods for estimating and testing effects in genomic studies with multiple conditions. *Nat Genet* **51**, 187–195 (2019).
36. O. Savolainen, M. Lascoux, J. Merilä, Ecological genomics of local adaptation. *Nat Rev Genet* **14**, 807–820 (2013).
37. D. B. Lowry, *et al.*, QTL × environment interactions underlie adaptive divergence in switchgrass across a large latitudinal gradient. *PNAS* **116**, 12933–12941 (2019).
38. A. Korte, A. Farlow, The advantages and limitations of trait analysis with GWAS: a review. *Plant Methods* **9**, 29 (2013).
39. M. Stephens, False discovery rates: a new deal. *Biostatistics* **18**, 275–294 (2017).



## Figures and Tables

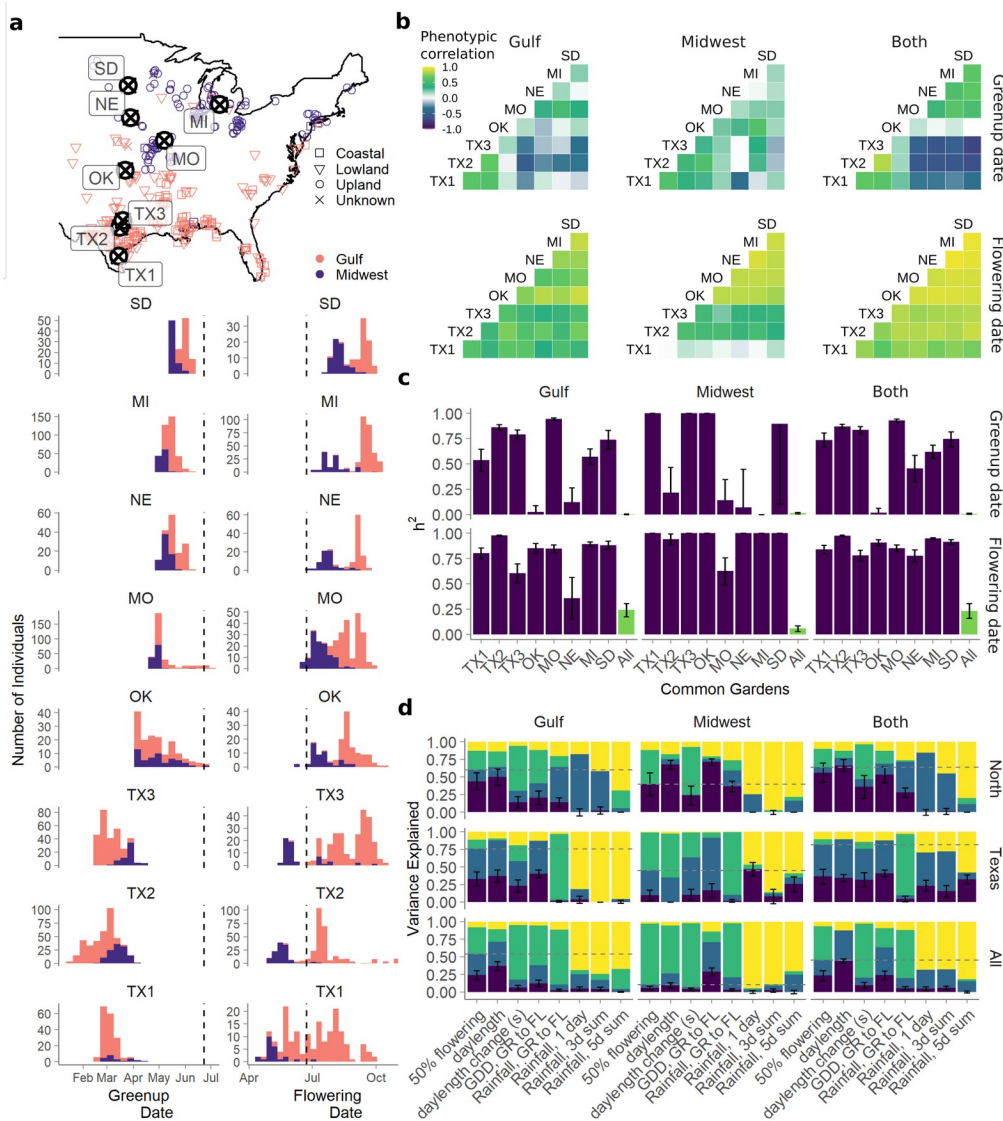

**Figure 1.** Characterization of green-up and flowering dates from the switchgrass diversity panel. (a) Map of common garden sites and genotype locations of origin, and trait histograms of green-up and flowering dates. Purple represents individuals from the Midwest genetic subpopulation, and pink individuals from the Gulf subpopulation. Vertical dashed lines indicate the summer solstice. Common gardens are arranged in latitudinal order. (b) Phenotypic correlations between clonal replicates planted at eight common gardens, within and between two genetic subpopulations. (c) Narrow sense heritability of green-up and flowering estimated within single common gardens (purple) and jointly at eight common gardens (green), within and between two genetic subpopulations. (d) Variance components analysis of genetic (G, purple), genotype-by-environment (GxE, blue), environmental/garden-specific (green), and residual (yellow) terms in models of flowering time as functions of day of the year or weather, for the four northern common gardens (North), the three Texas common gardens (Texas), and for all eight common gardens (All). Dashed lines indicate the cumulative contribution of G and GxE for flowering as a function of day of the year. Error bars represent  $2*SE$  around the contribution of G.

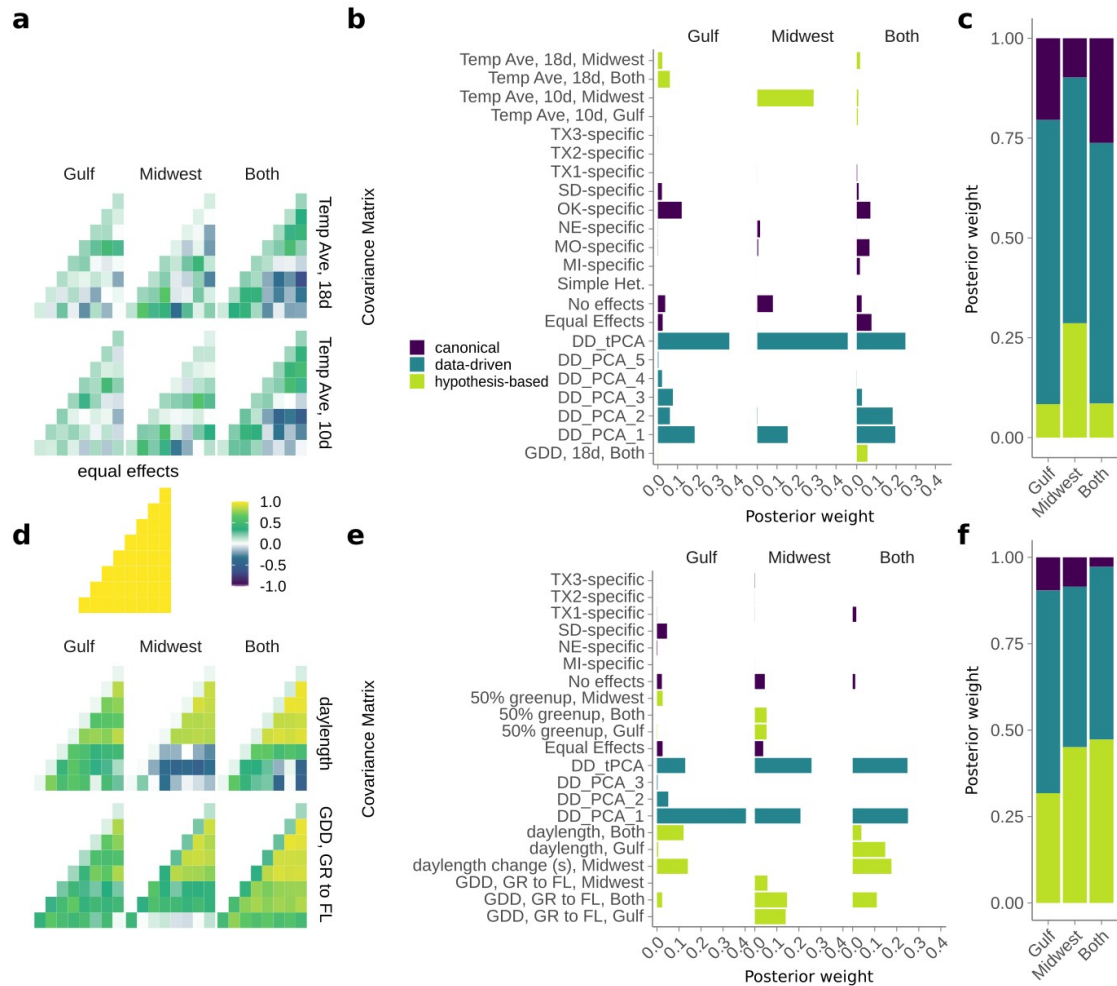

**Figure 2.** Distribution of SNP effects on different genotype-by-environment covariance models. (a,d) Six example weather/hypothesis-based covariance matrices specified for the (a) green-up date phenotype and (d) flowering date phenotype. Common gardens are arranged in latitudinal order. A canonical covariance matrix of equal effects is also shown. (b,e) Total posterior weight placed on each covariance matrix specified for (b) green-up date and (e) flowering date mash models. Hypothesis-based covariance matrices (green) are described in Table S1. Data-driven matrices (teal) are specific to each mash model, and canonical matrices (purple) have simple interpretations, such as effects specific to a single common garden. Covariance matrices included in mash that had zero posterior weight in all three mash runs on the genetic subgroups are not shown. (c,f) Total posterior weight placed on covariance matrices that were hypothesized, data-driven, or canonical, for the (c) green-up date phenotype and (f) flowering date phenotype.

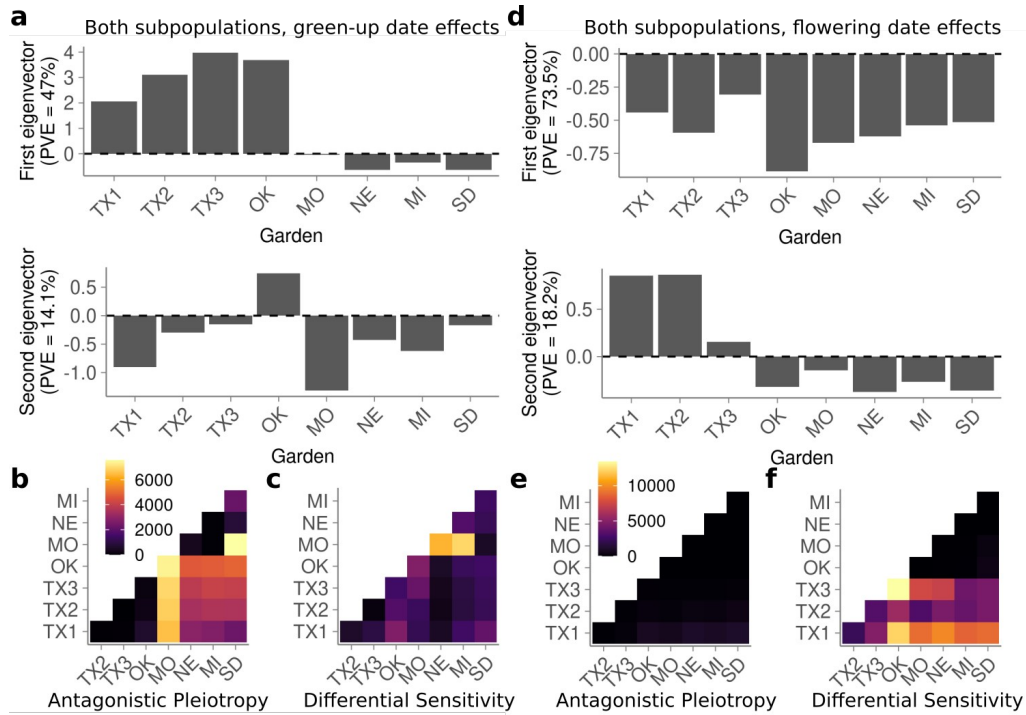

**Figure 3.** Effect patterns exhibited by the major data-driven matrices for Both subpopulations from Figure 2. (a-c) Green-up date. (d-f) Flowering date. (a,d) Single-garden effect representations (eigenvectors) of the DD\_tPCA data-driven matrices, which are overall matrices describing all data-driven effects. The percent variation in DD\_tPCA explained by each eigenvector is shown on the y-axis. Common gardens are arranged in latitudinal order along the x-axis. In addition, the first eigenvector explains 100% of the variation in DD\_PCA\_1, and second explains 100% of the variation in DD\_PCA\_2. (b,e) The number of SNPs with significant effects in both conditions that exhibit antagonistic pleiotropy between that pair of conditions. (c,f) Same as (b,e) except for differential sensitivity.

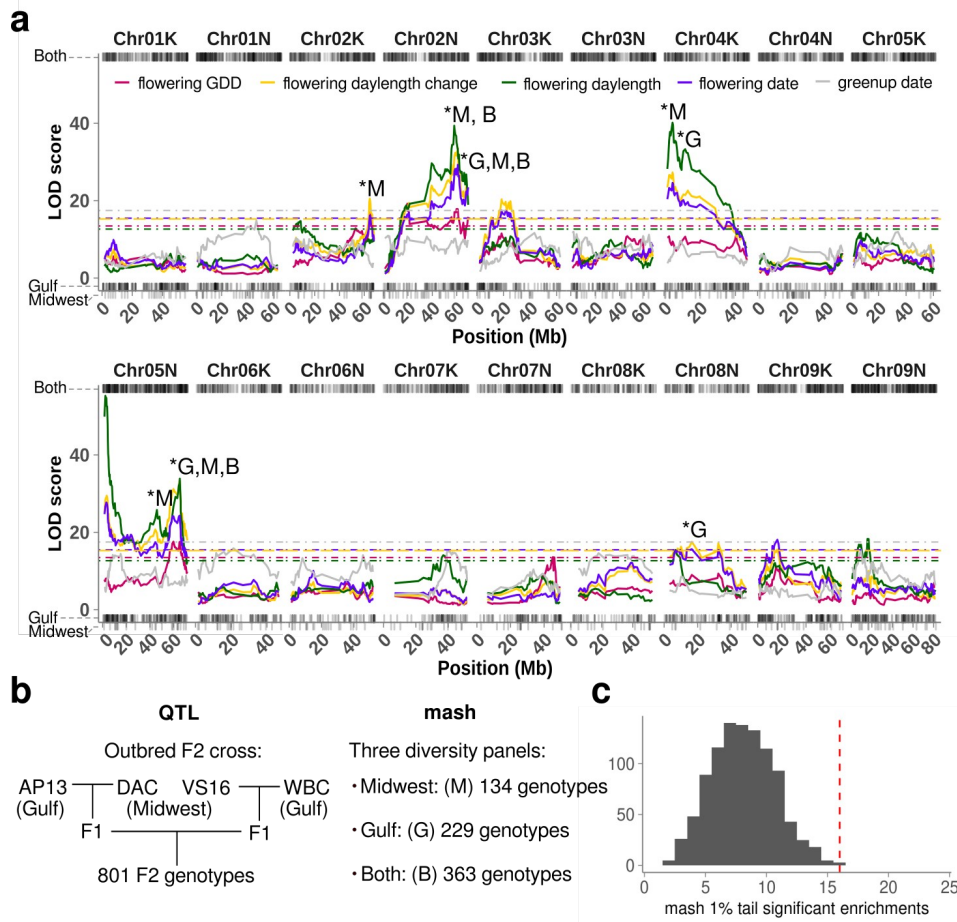

**Figure 4.** Comparison of significant mash SNP effects from a diversity panel and effects from an outbred pseudo-F2 cross. **(a)** QTL mapping for four weather-related functions of flowering, and for green-up date, as indicated by the colors: pink, growing degree days (GDD) from green-up date to flowering date, yellow, day length change on the flowering date, green, day length on flowering date; purple, flowering date; gray, green-up date. Dotted lines indicate permutation-based significance thresholds for each weather-related function. Stars indicate QTL with significant enrichment for SNPs in the 1% mash tail of significance; B, G, and M indicate which subpopulation had enrichment: B - both subpopulations, G - Gulf subpopulation, M -Midwest subpopulation. Rug plots show genomic locations of SNPs in the 1% mash tail for flowering date for each subpopulation. **(b)** Schematic comparison of genotypes used for QTL mapping and genotypes used in mash. **(c)** Number of mash runs enriched for SNPs in the 1% mash tail in the 23 QTL intervals from **(a)** (dotted red line), compared to 1000 sets of 23 random QTL intervals of the same size (histogram).



**Table 1.** Summary of sharing among SNP effects significant at pairs of common gardens.

| Sharing criterion   | Type of GxE              | Proportion of effects |             |             |                |             |             |
|---------------------|--------------------------|-----------------------|-------------|-------------|----------------|-------------|-------------|
|                     |                          | Green-up date         |             |             | Flowering date |             |             |
|                     |                          | North-North           | North-Texas | Texas-Texas | North-North    | North-Texas | Texas-Texas |
| No sharing          | Antagonistic pleiotropy  | 0.29                  | 0.76        | 0.00        | 0.00           | 0.02        | 0.00        |
| Shared by sign      | Differential sensitivity | 0.49                  | 0.20        | 0.09        | 0.00           | 0.34        | 0.18        |
| Shared by magnitude | no GxE                   | 0.22                  | 0.04        | 0.91        | 1.00           | 0.64        | 0.82        |

Numbers give proportion of effects that are significant in the Gulf & Midwest populations at both of a pair of common gardens and that meet a given sharing criterion: shared by sign requires that the effect have the same sign at both gardens; shared by magnitude requires that the effect also be within a factor of 2 of the strongest effect. The type of genotype-by-environment interaction (GxE) represented by each sharing criterion is also shown.
